# Supplementary material for: Structural stability and electronic and mechanical properties of nitrogen- and boron-doped fluorinated diamane
Source: Royal Society of Chemistry journal article supplement (doi:10.1039/d3cp03302c), 2023-01-01
Supplement: d3cp03302c1.pdf [file d3cp03302c1.pdf]

**Supporting Information**

*for*

**Structural stability, electronic and mechanical properties of nitrogen and boron  
doped fluorinated diamane**

Lilin Gao<sup>a</sup>, Yaning Liu<sup>a</sup>, Yaqi Liang<sup>a</sup>, Nan Gao<sup>a,b\*</sup>, Junsong Liu<sup>a\*</sup>, Hongdong Li<sup>a,b\*</sup>

*<sup>a</sup>State Key Lab of Superhard Materials, College of Physics, Jilin University,  
Changchun 130012, China*

*<sup>b</sup>Shenzhen Research Institute, Jilin University, Shenzhen 518057, China*

**Corresponding Authors**

Email address: [gaon@jlu.edu.cn](mailto:gaon@jlu.edu.cn), [jsliu@jlu.edu.cn](mailto:jsliu@jlu.edu.cn), [hdli@jlu.edu.cn](mailto:hdli@jlu.edu.cn)

Table S1 Formation energies of pristine F-diamane and F-diamane with dopants.

| <b>structures</b> | <b>formation energy (eV)</b> |
|-------------------|------------------------------|
| F-diamane         | -0.545                       |
| FD-1N             | -0.528                       |
| FD-3N             | -0.539                       |
| FD-1B             | -0.539                       |
| FD-2B             | -0.555                       |
| FD-3B             | -0.533                       |

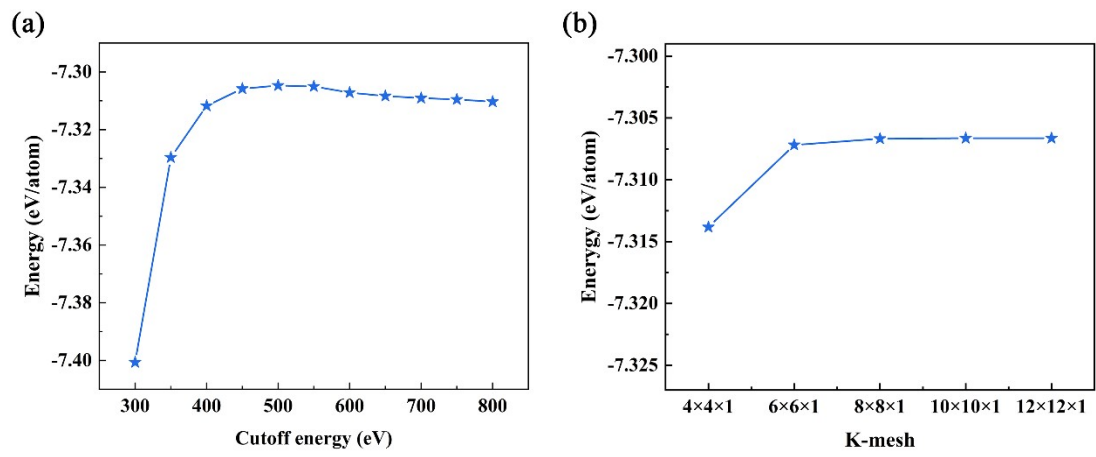

**Fig. S1** Convergence test of plane wave cutoff energy and  $k$ -points.

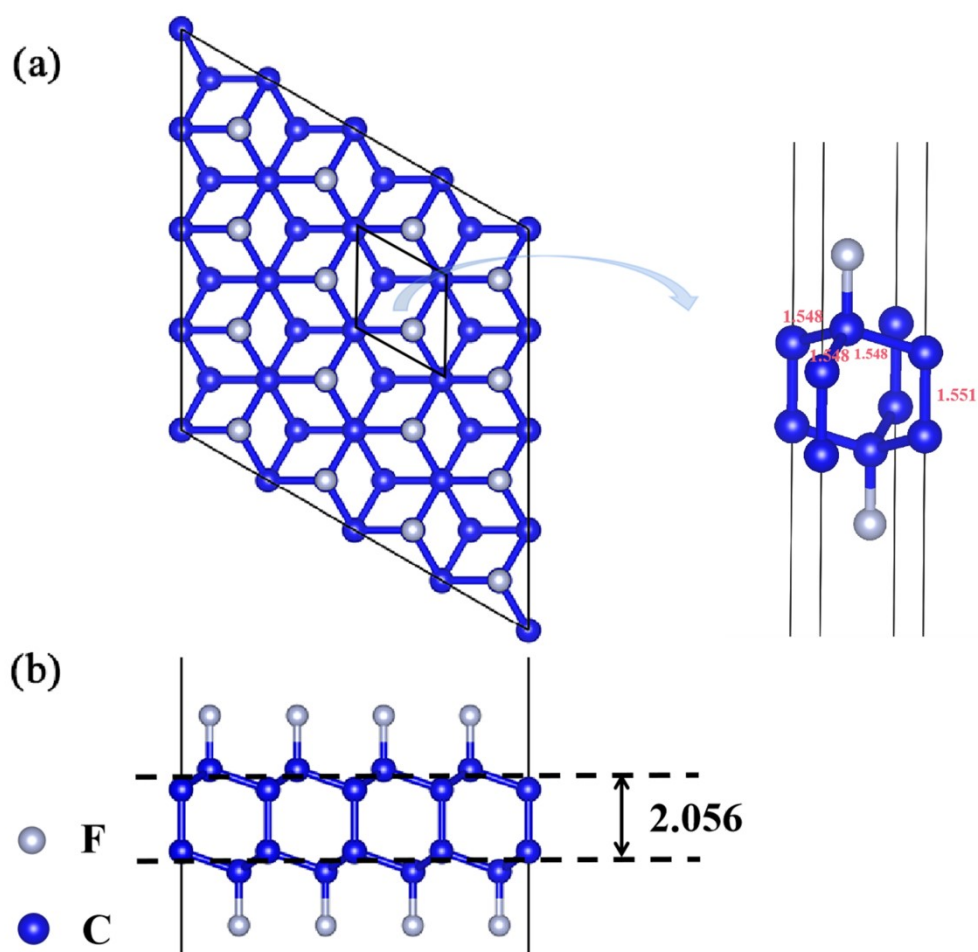

**Fig. S2** (a) Top and (b) side views of F-diamane with  $4 \times 4 \times 1$  supercell. The interlayer separation and C-C bond lengths are labeled.

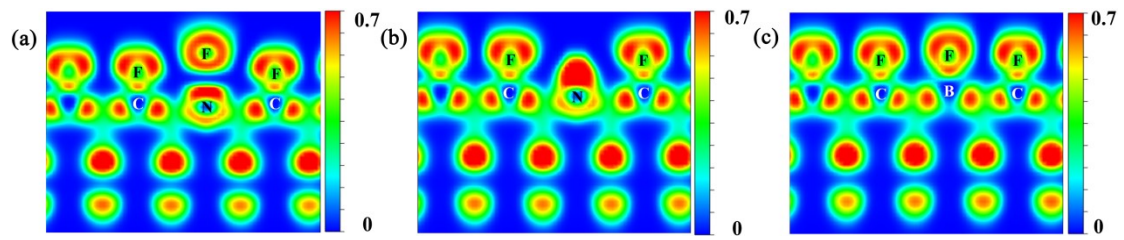

**Fig. S3** Electron localization function of (a) FD-2N, (b) FD-3N and (c) FD-2B structures. The red (blue) regions represent the localized (delocalized) electronic states.

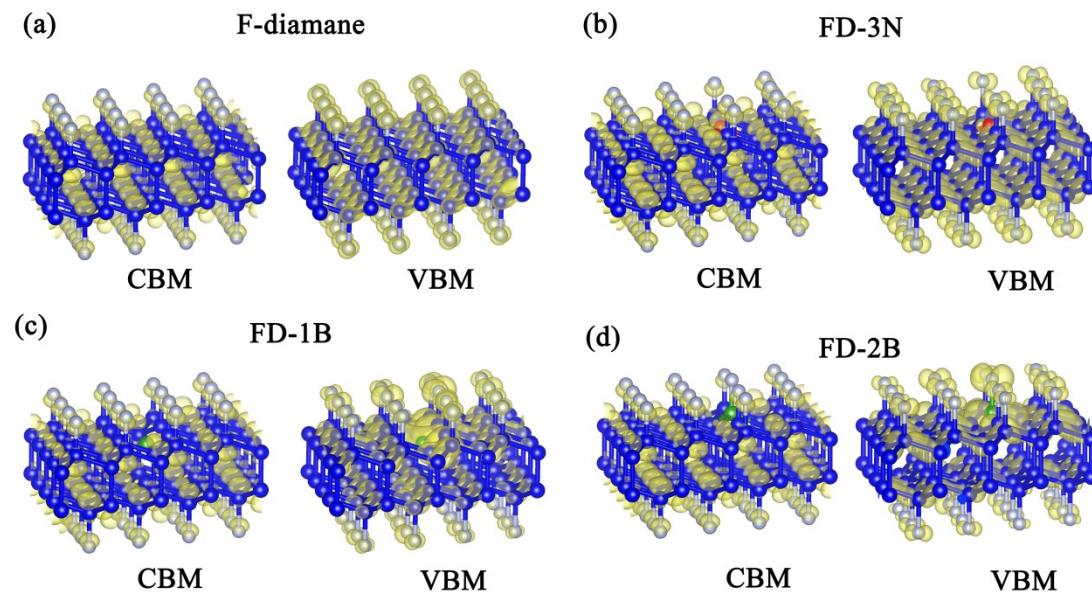

**Fig. S4** Charge density of CBM and VBM at  $\Gamma$  point for (a) F-diamane, (b) FD-3N, (c) FD-1B, (d) FD-2B structures with an isosurface level of  $0.002 e/\text{\AA}^3$ .

CBM and VBM for FD-3N, FD-1B, FD-2B structures are nearly the same as pristine F-diamane, except the slight contribution of B dopants in VBM for FD-1B and FD-2B structures.
